# Supplementary material
Source: PubMed Central journal article supplement (PMC3203675)
Supplement: cr201129x4.pdf [file cr201129x4.pdf]

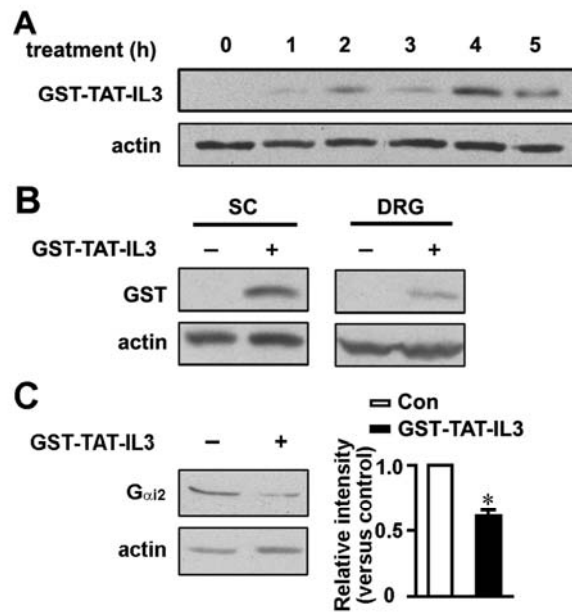

**Supplementary information, Figure S4** (A) Neurons dissociated from DRGs of mice are incubated with GST-TAT-IL3 (1  $\mu$ g) and then processed for examining the intracellular levels of GST-TAT-IL3. Immunoblotting shows that GST-TAT-IL3 could be detected in the treated DRG neurons after incubation for 1 h. (B) Eight hours after intraperitoneal infusion (i.p.), GST-TAT-IL3 can be detected in the extracts from the DRG and the spinal cord of mice after intraperitoneal injection. (C) Immunoblotting shows that the amount of G<sub>αi2</sub> in the dorsal spinal cord of mice was decreased after GST-TAT-IL3 treatment. \* $P < 0.05$  versus control ( $n = 3$ ).
